# Supplementary figures and images for: Identification and Validation of Nutrient State-Dependent Serum Protein Mediators of Human CD4+ T Cell Responsiveness
Source: MDPI journal article supplement (doi:10.3390/nu13051492), 2021-04-28

**A**

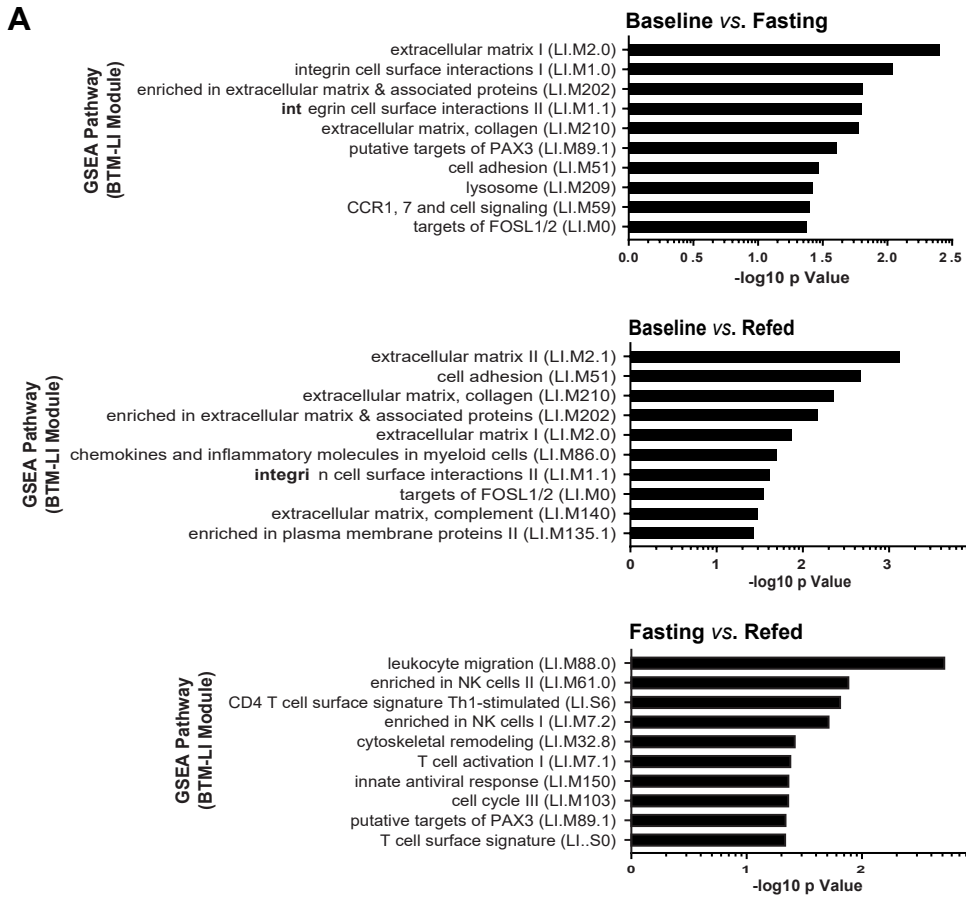

**B**

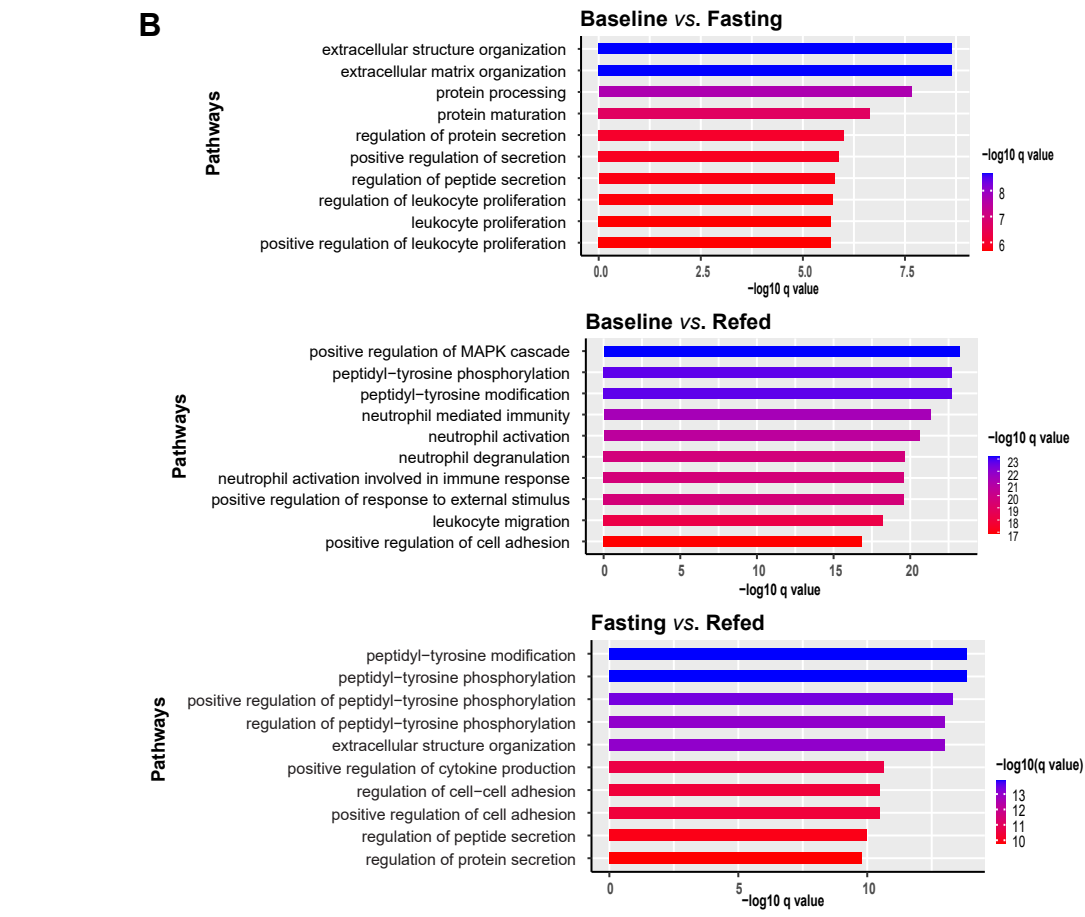

Suppl. Figure S2

Supplement: s1 [file s1]

**A**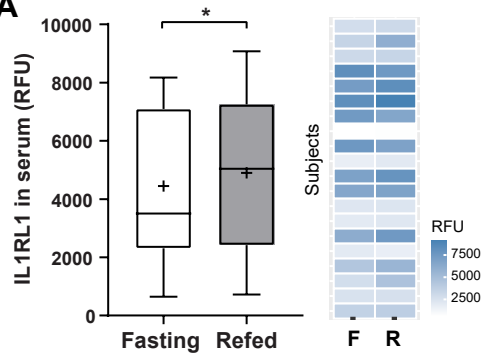**B**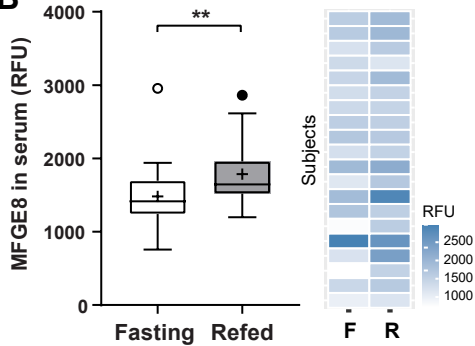**Suppl. Figure S5**

Supplement: s1 [file s1]

**A**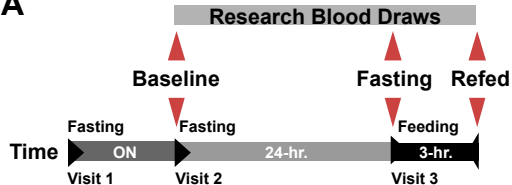**B**

Blood draw after baseline,  
24-hr. fasting, and refeeding (n=21)

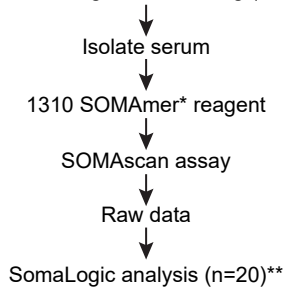

**Suppl. Figure S1**

Supplement: s1 [file s1]

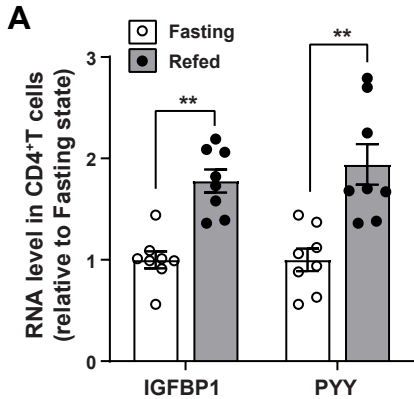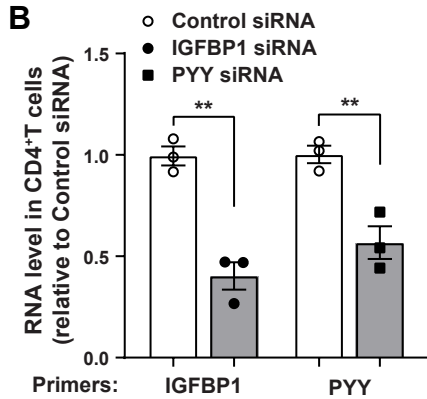

**Suppl. Figure S4**

Supplement: s1 [file s1]

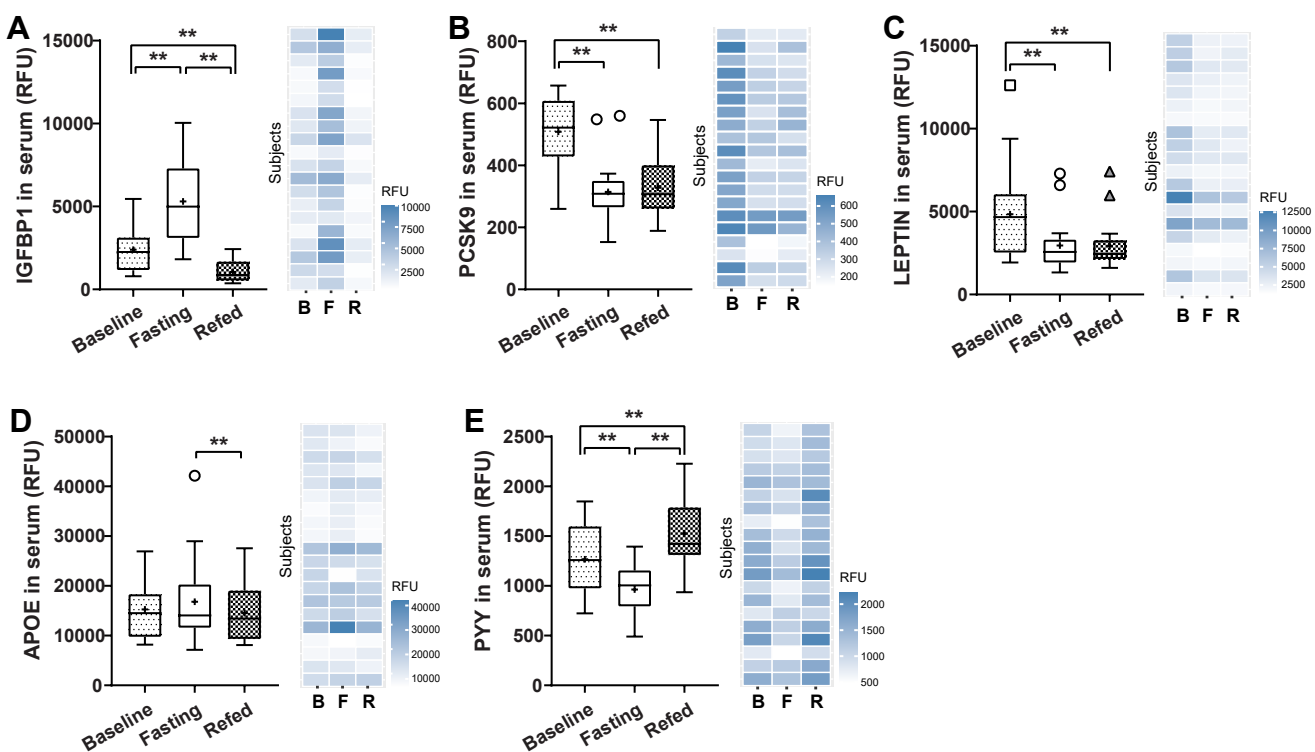

Suppl. Figure S3

Supplement: s1 [file s1]
